# Supplementary material for: Expression patterns of members of the ethylene signaling–related gene families in response to dehydration stresses in cassava
Source: PLoS One. 2017 May 23;12(5):e0177621. doi: 10.1371/journal.pone.0177621 (PMC5441607; doi:10.1371/journal.pone.0177621)
Supplement: S7 Table — (XLSX) [file pone.0177621.s007.xlsx]

## Sheet: Sheet1
叶				茎
PEG-6000	0h			PEG-6000	0h			根				块根
ERF3	10.3474			ERF3	3.69809			PEG-6000	0h			PEG-6000	0h
	1.81635				0.505925			ERF3	1.99999			ERF3	5.71766
ERF14	1.37055			ERF14	2.50534				0.331752				0.196129
	0.524038				0.0122794			ERF14	1.17309			ERF14	0
NACL	0h			NACL	0h				0.0344929				0
ERF3	6.9785			ERF3	4.14355			NACL	0h			NACL	0h
	3.67883				0.203006			ERF3	1.6552			ERF3	4.60532
ERF14	1.02123			ERF14	4.89162				0.487626				1.1612
	0.0300278				0.143831			ERF14	2.41162			ERF14	0
自然干旱	0d			自然干旱	0d				4.0943e-15				0
ERF3	9.5588			ERF3	2.75432			自然干旱	0d			自然干旱	0d
	1.72403				0.188848			ERF3	1.11557			ERF3	8.1481
ERF14	1.07834			ERF14	4.22817				0.163444				0.51882
	0.110795				0.0414464			ERF14	1.02851			ERF14	0
									0.0403178				0

## Sheet: Sheet2
叶
PEG-6000	0h	NACL	0h	自然干旱	0d
ERF3	10.3474	ERF3	6.9785	ERF3	9.5588
	1.81635		3.67883		1.72403
ERF14	1.37055	ERF14	1.02123	ERF14	1.07834
	0.524038		0.0300278		0.110795
茎
PEG-6000	0h	NACL	0h	自然干旱	0d
ERF3	3.69809	ERF3	4.14355	ERF3	2.75432
	0.505925		0.203006		0.188848
ERF14	2.50534	ERF14	4.89162	ERF14	4.22817
	0.0122794		0.143831		0.0414464
根
PEG-6000	0h	NACL	0h	自然干旱	0d
ERF3	1.99999	ERF3	1.6552	ERF3	1.11557
	0.331752		0.487626		0.163444
ERF14	1.17309	ERF14	2.41162	ERF14	1.02851
	0.0344929		4.0943e-15		0.0403178
块根
PEG-6000	0h	NACL	0h	自然干旱	0d
ERF3	5.71766	ERF3	4.60532	ERF3	8.1481
	0.196129		1.1612		0.51882
ERF14	0	ERF14	0	ERF14	0
	0		0		0

## Sheet: Sheet3
叶
	O(0h)		S(0h)		D(0d)
ERF3	10.3474	ERF3	6.9785	ERF3	9.5588		8.96158
	1.81635		3.67883		1.72403
ERF14	1.37055	ERF14	1.02123	ERF14	1.07834		1.15671
	0.524038		0.0300278		0.110795
茎
	O(0h)		S(0h)		D(0d)
ERF3	3.69809	ERF3	4.14355	ERF3	2.75432		3.53199
	0.505925		0.203006		0.188848
ERF14	2.50534	ERF14	4.89162	ERF14	4.22817		3.87505
	0.0122794		0.143831		0.0414464
根
	O(0h)		S(0h)		D(0d)
ERF3	1.99999	ERF3	1.6552	ERF3	1.11557		1.59025
	0.331752		0.487626		0.163444
ERF14	1.17309	ERF14	2.41162	ERF14	1.02851		1.53774
	0.0344929		4.0943e-15		0.0403178
块根
	O(0h)		S(0h)		D(0d)
ERF3	5.71766	ERF3	4.60532	ERF3	8.1481		6.15703
	0.196129		1.1612		0.51882
ERF14	0	ERF14	0	ERF14	0		0
	0		0		0

## Sheet: Sheet4
	Stem	Leaf	Root	Tuber
ERF3	3.53199	8.96158	1.59025	6.15703
ERF14	3.87505	1.15671	1.53774	0

## Sheet: Sheet5
S7 Table. Expression data (log2 (expression values + 1)) of MeERF3 and MeERF14 in different tissues of cassava at all timepoints after drought, osmotic and salt treatments.
Gene	Time	Stem	Leaf	Root	Tuber
MeERF3	0 h/d (control)	3.53199	7.96158	1.59025	5.15703
	Other timepoints after various abiotic stress treatments	0	0	0	0
MeERF14	0 h/d (control)	3.37505	1.15671	1.23774	0
	Other timepoints after various abiotic stress treatments	0	0	0	0
