# Supplementary material for: Expression patterns of members of the ethylene signaling–related gene families in response to dehydration stresses in cassava
Source: PLoS One. 2017 May 23;12(5):e0177621. doi: 10.1371/journal.pone.0177621 (PMC5441607; doi:10.1371/journal.pone.0177621)
Supplement: S9 Table — (XLSX) [file pone.0177621.s009.xlsx]

## Sheet: Sheet1
S9 Table. Statistical analysis (Student's t-test) of expression data (log2-based values) of the ethylene receptor genes and transcription factor genes after various abiotic stress treatments in cassava leaves (t(0.05,4)=2.776).
Gene	D(3d)	D(6d)	D(9d)	D(12d)	D(15d)	D(18d)	O(1h)	O(2h)	O(4h)	O(8h)	O(12h)	O(24h)	S(1h)	S(2h)	S(4h)	S(8h)	S(12h)	S(24h)
MeERS1	2.7791	4.01539	1.49919	28.3615	6.93141	3.0084	3.78423	2.39802	25.8495	3.61449	1.65406	0.707881	1.55091	2.3492	3.58432	5.09052	3.36195	9.71255
MeERS2	32.6242	75.3048	5.59355	69.0214	58.6279	19.4948	7.58836	23.4169	258.723	9.43402	9.3261	39.2086	20.6748	2.10356	5.68014	8.23606	34.0242	19.9968
MeERS3	2.86441	11.2434	7.18067	18.5195	73.2509	6.8992	39.252	6.71387	164.705	2.00668	2.24282	49.744	18.7891	6.01255	5.68468	3.27416	8.4695	339.742
MeERS4	25.6548	138.877	8.90863	35.8928	12.0325	26.3477	25.0693	3.68637	3.16513	6.31525	10.53	11.3463	12.4981	9.6913	0.0782618	22.4948	7.2155	2.56562
MeERS5	90.5001	5.03858	42.5215	334.542	4571.37	6.06295	8.28451	6.44106	3.69059	0.468682	3.28703	2.25199	4.89905	0.509703	1.5273	11.757	4.74638	72.5644
MeETR2	69.7492	42.2359	70.0709	69.7355	17.9231	9.54153	1.4004	59.2709	11.5872	50.2764	23.74	6.40062	2.96273	2.07058	1.03711	5.85529	6.35758	5.6125
MeEIN4	102.882	4.40853	110.341	2.39131	12.3259	312.779	7.83785	0.36642	12.4206	9.3268	0.415799	10.6987	14.6142	23.8157	11.2983	1.59762	11.253	5.35998
MeERF1	1.9485	13.1372	22.7812	18.6108	7.3665	22.2684	2.34343	5.53744	14.0632	3.90232	13.9818	7.1232	8.35153	89.6567	2.20415	1.72456	32.0345	12.2489
MeERF2	35.8776	0.0323025	3.51816	17.8755	15.7844	159.351	16.0935	11.9168	2.38621	16.31	29.1045	16.8724	1.16207	1.73703	0.45268	0.485224	20.6052	6.40943
MeERF4	24.3261	6.83113	21.9843	34.7311	352.925	2.8025	12.0675	6.12322	3.28356	10.3839	15.534	11.3602	103.92	3.74992	81.0713	86.7383	176.679	39.1136
MeERF5	5.47603	1.51804	1.0088	11.7244	12.3617	1.27406	10.8062	16.966	4.10784	1.34045	15.6448	5.34284	3.84992	2.72195	2.48903	30.2256	85.8185	36.8219
MeERF6	14.665	3.18674	4.99695	9.81176	25.4667	5.26401	0.76607	1.33561	6.55386	7.42236	9.3844	54.9144	17.7477	21.2856	20.3567	12.868	16.0886	18.6128
MeERF7	0.736269	4.55347	7.8595	4.95668	327.63	13.5923	10.2794	13.3284	6.79932	4.31792	1.14379	15.9359	1.88104	3.33038	2.6965	2.34926	1.57904	2.51792
MeERF8	0.260024	0.33203	14.8819	16.2496	11.9584	16.3608	8.72096	12.009	5.76064	6.18485	10.2081	11.2795	19.2843	320.486	63.5834	55.6734	46.1433	65.1308
MeERF9	9.5839	0.370659	4.10685	13.0263	160.818	0.96088	6.47106	17.8049	3.96579	77.2212	17.9901	18.1566	2.84558	12.6445	14.5411	11.6662	24.8033	7.66902
MeERF10	34.2991	24.4785	70.8329	218076	85.1711	22.6175	4.11855	4.8443	9.25452	15.583	2.9051	12.8857	3.37335	9.49745	23.2557	4.71689	22.9783	8.7818
MeERF11	0.675785	59.9655	19.8506	4.90688	172.445	83.5899	1.93062	3.90671	4.57543	4.25731	12.2497	1.25798	65.9125	71.5328	73.4141	26.5737	79.0993	1.00125
MeERF12	7.66861	4.6343	1.00455	4.98817	34.8214	337.441	0.961275	2.72305	9.81821	1.72097	24.1042	1.16807	9.96486	6.44403	5.44584	8.37544	2.98446	5.55991
MeERF13	9.11643	24.8143	30.6162	276.664	23.5152	242.919	20.9201	4.90726	9.93708	10.8378	11.4329	6.87116	10.4439	10.9962	1.89537	9.56093	12.1242	12.9934
MeEIL1	1.8338	33.595	1.41443	135.977	8.94246	2.57045	16.2524	16.942	6.89002	6.77994	11.7968	1.77585	30.1971	28.0275	18.8218	31.4676	5.51296	28.0147
MeEIL2	5.87833	22.7571	6.39154	11.414	8.26449	3.98339	4.81522	1.13359	0.573209	4.0129	4.22541	5.38858	12.9615	14.3329	3.73481	1.23167	1.8504	1.5453
D, O, and S respectively denote drought, osmotic and salt stress treatments.
