# Supplementary material for: Expression patterns of members of the ethylene signaling–related gene families in response to dehydration stresses in cassava
Source: PLoS One. 2017 May 23;12(5):e0177621. doi: 10.1371/journal.pone.0177621 (PMC5441607; doi:10.1371/journal.pone.0177621)
Supplement: S10 Table — (XLSX) [file pone.0177621.s010.xlsx]

## Sheet: Sheet1
S10 Table. Numbers of up- or down-regulated members of ethylene receptor genes and transcription factor genes in expression after various abiotic stress treatments in cassava leaves.
Gene		Regulated by drought stress		Regulated by osmotic stress		Regulated by salt stress		Regulated by three stresses
		Up	Down	Up	Down	Up	Down	Up	Down
Ethylene receptor genes	Numbers (points)	20/42	7/42	11/42	5/42	13/42	6/42	44/126	18/126
	Percentage (%)	47.619	16.6667	26.1905	11.9048	30.9524	14.2857	34.9206	14.2857
Ethylene transcription factor genes	Numbers (points)	40/84	18/84	32/84	16/84	22/84	33/84	94/252	67/252
	Percentage(%)	47.619	21.4286	38.0952	19.0476	26.1905	39.2857	37.3016	26.5873
MeERFs genes	Numbers (points)	35/72	16/72	31/72	14/72	20/72	28/72	86/216	58/216
	Percentage(%)	48.6111	22.2222	43.0556	19.4444	27.7778	38.8889	39.8148	26.8519
MeEILs genes	Numbers (points)	5/12	2/12	1/12	2/12	2/12	5/12	8/36	9/36
	Percentage(%)	41.6667	16.6667	8.33333	16.6667	16.6667	41.6667	22.2222	25
All genes	Numbers (points)	60/126	25/126	43/126	21/126	35/126	39/126	138/378	85/378
	Percentage(%)	47.619	19.8413	34.127	16.6667	27.7778	30.9524	36.5079	22.4868
